# Supplementary material for: Fabrication of a “turn-on”-type enantioselective fluorescence sensor via a modified achiral MOF: applications for synchronous detection of phenylalaninol enantiomers
Source: Royal Society of Chemistry journal article supplement (doi:10.1039/d0an01879a), 2020-11-16
Supplement: d0an01879a1.pdf [file d0an01879a1.pdf]

# **Fabrication “Turn-On” Type Enantioselective Fluorescence Sensor via Modified Achiral MOF: Applied for Synchronous Detecting Phenylalaninol Enantiomers**

Jiannan Xiao<sup>a</sup>, Xueling Wang<sup>a</sup>, Xuebin Xu<sup>a</sup>, Fuli Tian<sup>b</sup> and Zhiliang Liu<sup>a,\*</sup>

<sup>a</sup>Inner Mongolia Key Laboratory of Chemistry and Physics of Rare Earth Materials,  
School of Chemistry and Chemical Engineering, Inner Mongolia University,  
Hohhot, 010021

<sup>b</sup>Key Laboratory of Medicinal and Edible Plants Resources of Hainan Province,  
Hainan Vocational University of Science and Technology, Haikou 571126

\*Corresponding author.

Fax/ Tel: +86-471-4992261

E-mail addresses: cezlliu@imu.edu.cn (Z. L. Liu)

## Contents

**Figure S1** TGA curves of UiO-66-(COOH)<sub>2</sub>, **S-1** and **R-1**

**Figure S2** N<sub>2</sub> adsorption and desorption isotherms of UiO-66-(COOH)<sub>2</sub>, **S-1** and **R-1**

**Figure S3** Pore-size distribution of UiO-66-(COOH)<sub>2</sub>, **S-1** and **R-1**

**Figure S4** (a) Solid-state excitation and emission spectra of **S-1** and **R-1**. (b) Solid-state emission spectra of UiO-66-(COOH)<sub>2</sub>, **S-1** and **R-1**

**Figure S5** Fluorescence emission spectra of **S-1** toward to L/D Amino propanol (a), L/D- Phenylglycinol (b) and L/D-Valinol (c)

**Figure S6** Fluorescence emission spectra of **R-1** toward to L/D Amino propanol (a), L/D- Phenylglycinol (b) and L/D-Valinol (c)

**Figure S7** PXRD patterns of **S-1** (a) and **R-1** (b) treated by L-PA and D-PA.

**Figure S8** Fluorescence lifetime fitting curve of **S-1** (a) and **R-1** (b) at 473 nm after adding L-PA and D-PA

**Table S1** Apparent Association Constants Obtained from S-V plot and Benesi-Hildebrand plot

**Table S2** Optimized energy terms (kcal/mol)

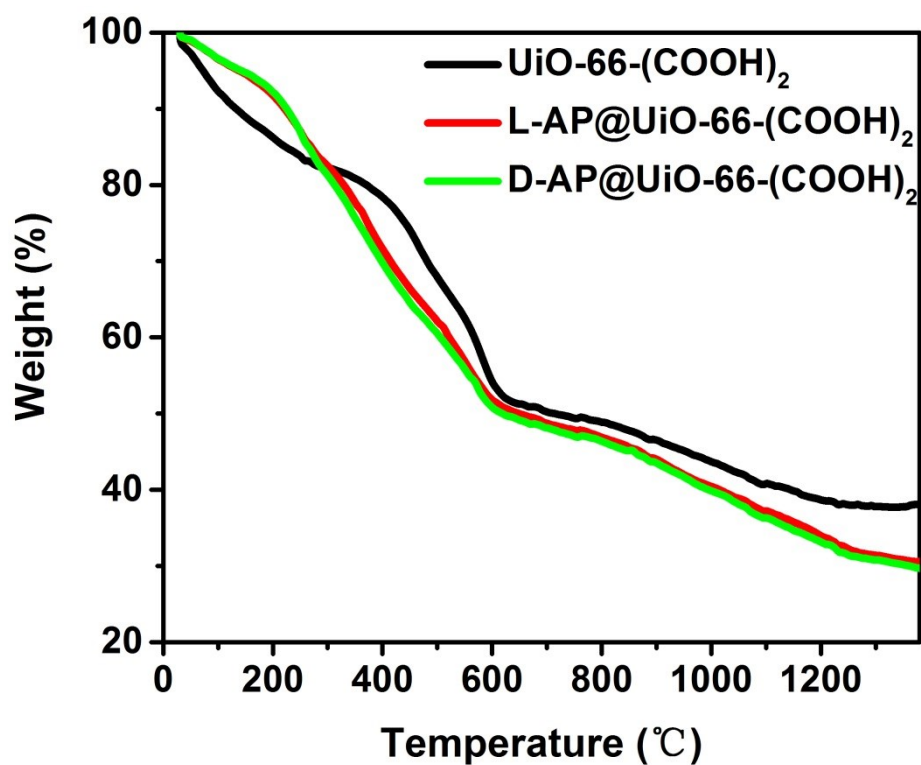

Figure S1 TGA curves of UiO-66-(COOH)<sub>2</sub>, S-1 and R-1

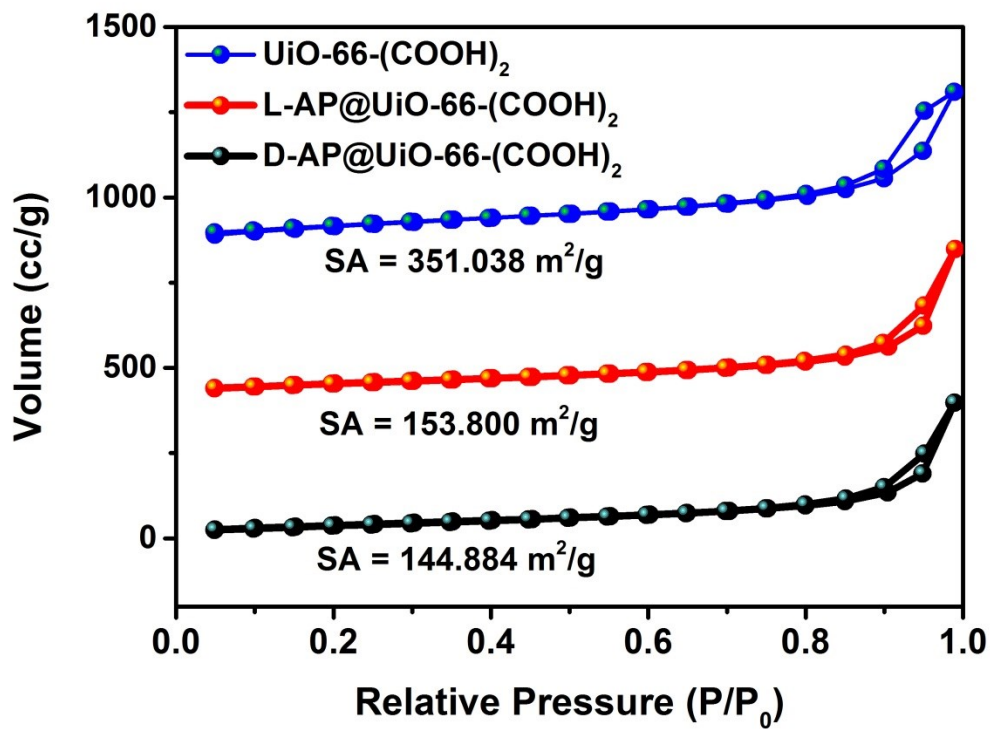

Figure S2 N<sub>2</sub> adsorption and desorption isotherms of UiO-66-(COOH)<sub>2</sub>, S-1 and R-1

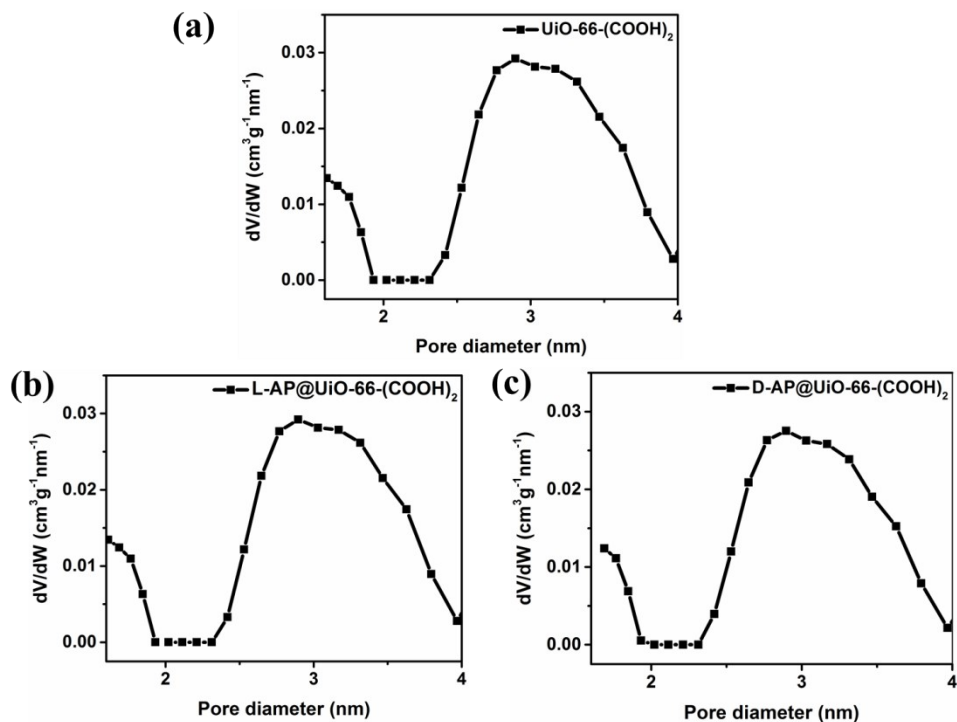

Figure S3 Pore-size distribution of  $\text{UiO-66-(COOH)}_2$ , S-1 and R-1

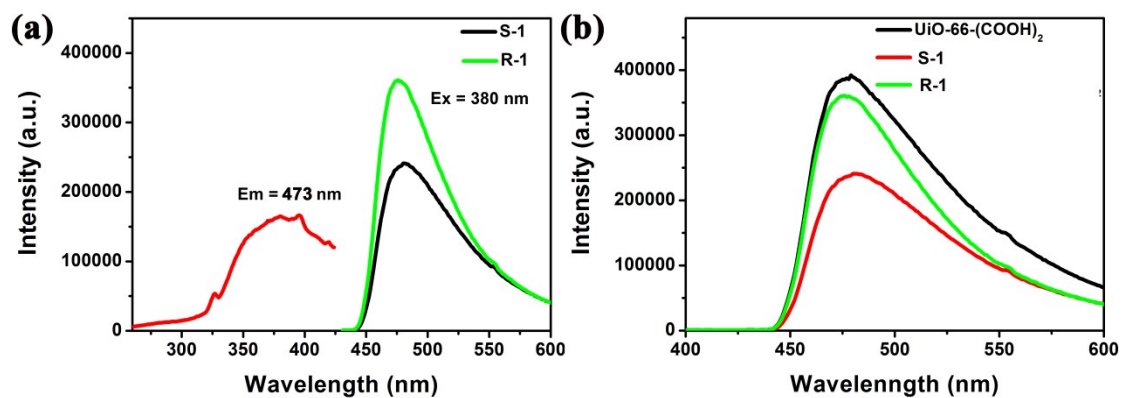

Figure S4 (a) Solid-state excitation and emission spectra of S-1 and R-1. (b) Solid-state emission spectra of  $\text{UiO-66-(COOH)}_2$ , S-1 and R-1

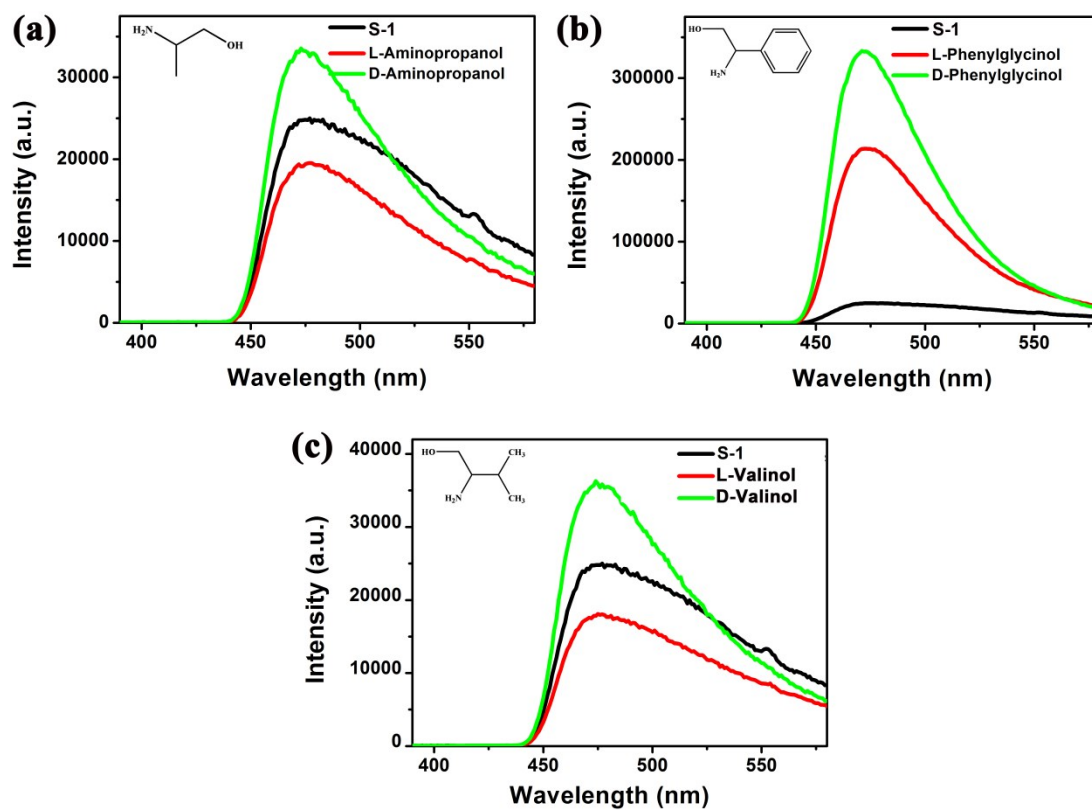

Figure S5 Fluorescence emission spectra of S-1 toward to L/D Amino propanol (a), L/D-Phenylglycinol (b) and L/D-Valinol (c)

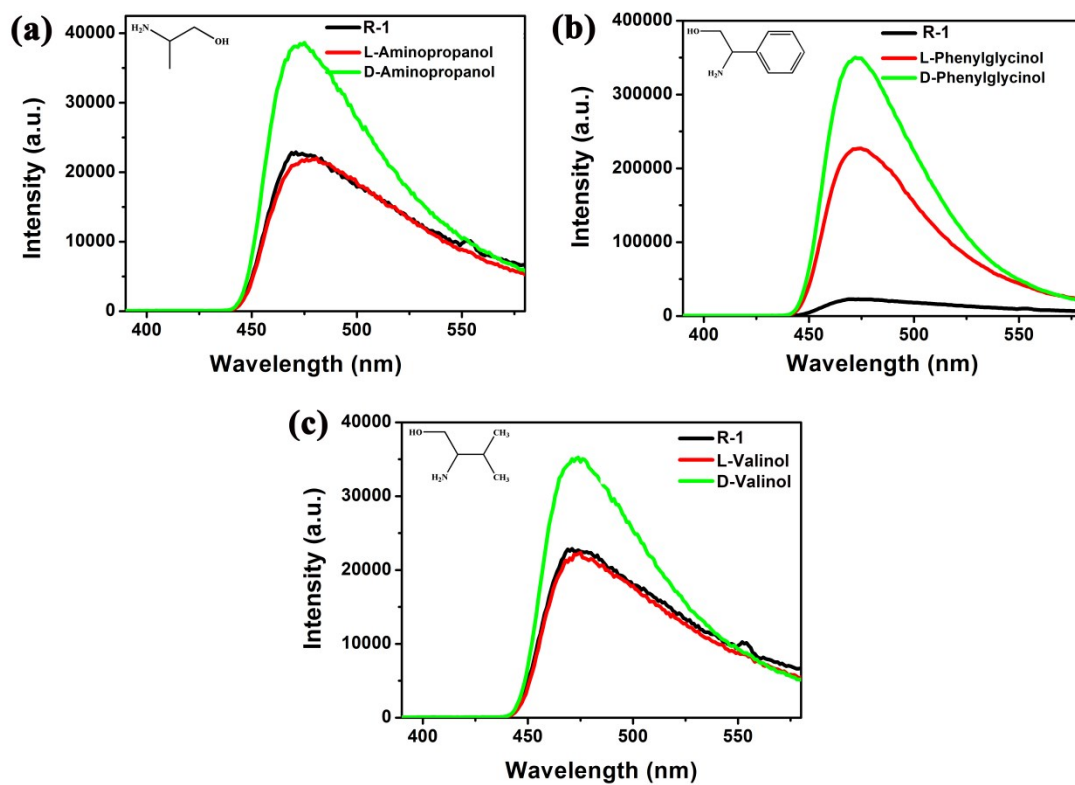

Figure S6 Fluorescence emission spectra of R-1 toward to L/D Amino propanol (a), L/D-Phenylglycinol (b) and L/D-Valinol (c)

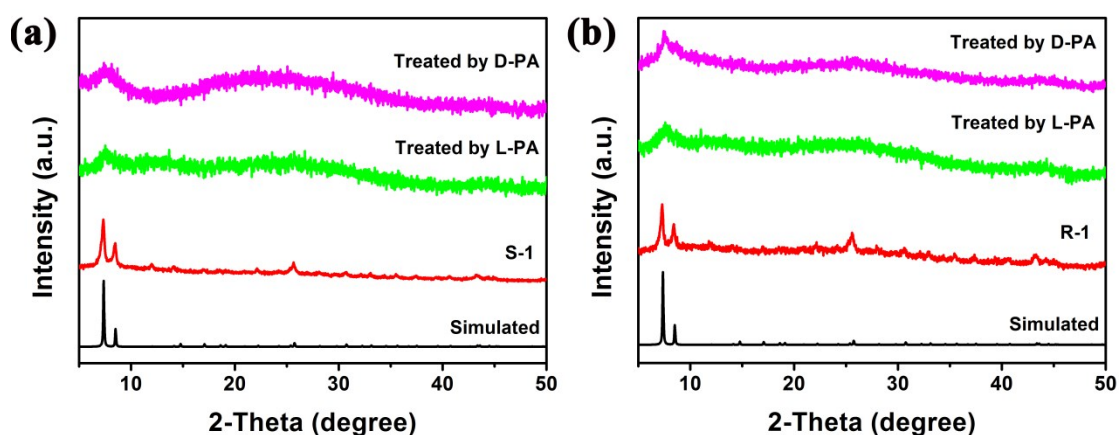

Figure S7 PXRD patterns of **S-1** (a) and **R-1** (b) treated by L-PA and D-PA

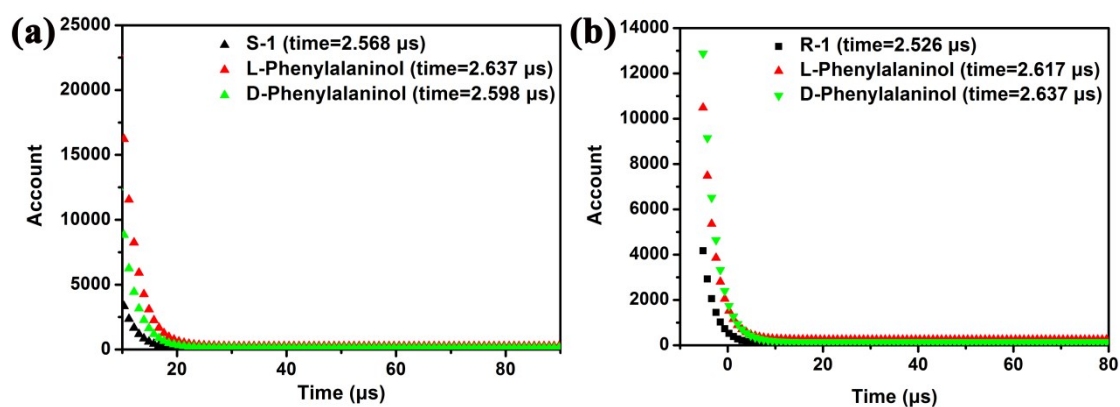

Figure S8 Fluorescence lifetime fitting curve of **S-1** (a) and **R-1** (b) at 473 nm after adding L-PA and D-PA

Table S1 Apparent Association Constants Obtained from S-V plot and Benesi-Hildebrand plot

|            |      | R <sup>2</sup> | LOD (M)                 | K <sub>EC</sub> (M <sup>-1</sup> ) | ef   | Ratio of K <sub>BH</sub> | α    | ΔΔG (kJ mol <sup>-1</sup> ) |
|------------|------|----------------|-------------------------|------------------------------------|------|--------------------------|------|-----------------------------|
| <b>S-1</b> | L-PA | 0.997          | 3.02 × 10 <sup>-7</sup> | 1591                               | 2.51 | 1.62                     | 1.89 | -1.18                       |
|            | D-PA | 0.993          | 5.70 × 10 <sup>-7</sup> | 842                                |      |                          |      |                             |
| <b>R-1</b> | L-PA | 0.912          | 5.94 × 10 <sup>-6</sup> | 101                                | 0.41 | 0.18                     | 0.67 | -4.12                       |
|            | D-PA | 0.995          | 3.97 × 10 <sup>-6</sup> | 151                                |      |                          |      |                             |

Table S2 Optimized energy terms (kcal/mol)

|          | L-PA    | D-PA    |
|----------|---------|---------|
| Stretch  | 0.5194  | 0.5183  |
| Bend     | 1.8135  | 1.8687  |
| Str-bend | 0.1325  | 0.1387  |
| Torsion  | -5.4050 | -5.5850 |

---

|               |          |          |
|---------------|----------|----------|
| Non-1,4 VDW   | -14.6615 | -10.4342 |
| 1,4 VDW       | 10.5596  | 10.3802  |
| Dipole/Dipole | -2.3804  | -1.4405  |
| Total Energy  | -9.4220  | -4.5538  |

---
